# Supplementary material
Source: PubMed Central journal article supplement (PMC9918672)
Supplement: NIHMS1853342-supplement-Supp1.pdf [file NIHMS1853342-supplement-Supp1.pdf]

|                                                            | DISCOVERY COHORT |      |             |            |     |             | VALIDATION COHORT |     |             |            |     |             |
|------------------------------------------------------------|------------------|------|-------------|------------|-----|-------------|-------------------|-----|-------------|------------|-----|-------------|
|                                                            | SSc-PAH          |      |             | SSc-no PAH |     |             | SSc-PAH           |     |             | SSc-no PAH |     |             |
|                                                            | N                |      |             | N          |     |             | N                 |     |             | N          |     |             |
| <b>Sex</b> (female), n (%)                                 | 15               | 14   | (93%)       | 16         | 14  | (88%)       | 24                | 17  | (71%)       | 17         | 15  | (88%)       |
| <b>Age</b> (yo), mean ( $\pm$ SD)                          | 15               | 65   | ( $\pm$ 7)  | 16         | 50  | ( $\pm$ 14) | 24                | 68  | ( $\pm$ 9)  | 17         | 67  | ( $\pm$ 7)  |
| <b>ANA</b> , n (%)                                         | 13               | 13   | (100%)      | 14         | 14  | (100%)      | 17                | 17  | (100%)      | 14         | 14  | (100%)      |
| - ACA, n (%)                                               | 12               | 9    | (75%)       | 9          | 4   | (44%)       | 8                 | 7   | (88%)       | 14         | 10  | (71%)       |
| - ATA, n (%)                                               | 12               | 0    | (0%)        | 9          | 1   | (11%)       | 8                 | 0   | (0%)        | 14         | 4   | (29%)       |
| - Anti-U1RNP, n (%)                                        | 12               | 1    | (8%)        | 9          | 2   | (22%)       | 8                 | 0   | (0%)        | 14         | 0   | (0%)        |
| <b>Disease duration</b>                                    |                  |      |             |            |     |             |                   |     |             |            |     |             |
| - since RP onset (y), mean ( $\pm$ SD)                     | 10               | 19   | ( $\pm$ 13) | 11         | 13  | ( $\pm$ 13) | 8                 | 18  | ( $\pm$ 12) | 15         | 24  | ( $\pm$ 17) |
| - since first non-RP symptom onset (y), median [Q1;Q3]     | 8                | 8    | [2;13]      | 10         | 10  | [3;12]      | 6                 | 7   | [0;17]      | 14         | 7   | [4;10]      |
| - since diagnosis (y), median [Q1;Q3]                      | 15               | 1.25 | [0.05;6]    | 16         | 7   | [1;11]      | 9                 | 0.5 | [0;9]       | 6          | 7   | [3;13]      |
| <b>BMI</b> (kg/m <sup>2</sup> ), mean ( $\pm$ SD)          | 15               | 28   | ( $\pm$ 4)  | 15         | 24  | ( $\pm$ 5)  | 16                | 28  | ( $\pm$ 6)  | 14         | 25  | ( $\pm$ 4)  |
| <b>mRSS</b> , median [Q1;Q3]                               | 5                | 3    | [2;5]       | 9          | 3   | [2;5]       | 7                 | 3   | [3;5]       | 14         | 6   | [3;8]       |
| <b>NYHA functional class</b>                               | 15               |      |             | 8          |     |             | 18                |     |             | 4          |     |             |
| - class I, n (%)                                           |                  | 0    | (0%)        |            | 8   | (100%)      |                   | 0   | (0%)        |            | 2   | (50%)       |
| - class II, n (%)                                          |                  | 7    | (47%)       |            | 0   | (0%)        |                   | 6   | (33%)       |            | 2   | (50%)       |
| - class III, n (%)                                         |                  | 8    | (53%)       |            | 0   | (0%)        |                   | 10  | (56%)       |            | 0   | (0%)        |
| - class IV, n (%)                                          |                  | 0    | (0%)        |            | 0   | (0%)        |                   | 2   | (11%)       |            | 0   | (0%)        |
| <b>BNP</b> (pg/mL), median [Q1;Q3]                         | 12               | 147  | [69;505]    | 2          | 25  | [24;27]     | 14                | 84  | [39;264]    |            |     |             |
| <b>Nt-pro-BNP</b> (pg/mL), median [Q1;Q3]                  |                  |      |             |            |     |             | 14                | 727 | [319;1098]  | 5          | 126 | [88;134]    |
| <b>eGFR</b> (mL/min/1.73m <sup>2</sup> ), mean ( $\pm$ SD) | 12               | 68   | ( $\pm$ 15) | 7          | 78  | ( $\pm$ 21) | 16                | 82  | ( $\pm$ 20) | 15         | 74  | ( $\pm$ 16) |
| <b>LVEF</b> (%), mean ( $\pm$ SD)                          | 12               | 60   | ( $\pm$ 9)  | 11         | 64  | ( $\pm$ 6)  | 14                | 65  | ( $\pm$ 9)  | 15         | 63  | ( $\pm$ 6)  |
| <b>Estimated sPAP</b> (mmHg), mean ( $\pm$ SD)             | 12               | 72   | ( $\pm$ 19) | 7          | 26  | ( $\pm$ 5)  | 15                | 59  | ( $\pm$ 16) | 10         | 28  | ( $\pm$ 4)  |
| <b>FVC</b> (% predicted), mean ( $\pm$ SD)                 | 13               | 85   | ( $\pm$ 10) | 16         | 110 | ( $\pm$ 15) | 20                | 88  | ( $\pm$ 18) | 13         | 111 | ( $\pm$ 14) |
| <b>DLCO</b> (% predicted), median [Q1;Q3]                  | 15               | 35   | [8;52]      | 16         | 92  | [87;109]    | 10                | 41  | [33;65]     | 12         | 65  | [59;82]     |

|                                                |    |                  |    |         |    |         |                  |         |   |   |
|------------------------------------------------|----|------------------|----|---------|----|---------|------------------|---------|---|---|
| <b>ILD on CT-scan, n (%)</b>                   | 15 | 6 (40%)          | 16 | 0 (0%)  | 24 | 5 (21%) | 17               | 6 (35%) |   |   |
| <b>Treatments</b>                              |    |                  |    |         |    |         |                  |         |   |   |
| - Prednisone, n (%)                            | 15 | 0 (0%)           | 16 | 2 (13%) | 16 | 1 (6%)  | 15               | 0 (0%)  |   |   |
| - Cyclophosphamide, n (%)                      | 15 | 0 (0%)           | 16 | 0 (0%)  | 16 | 0 (0%)  | 15               | 0 (0%)  |   |   |
| - Mycophenolate mofetil, n (%)                 | 15 | 0 (0%)           | 16 | 1 (6%)  | 16 | 0 (0%)  | 15               | 0 (0%)  |   |   |
| - D-penicillamine, n (%)                       | 15 | 0 (0%)           | 16 | 0 (0%)  | 16 | 2 (13%) | 15               | 0 (0%)  |   |   |
| - Azathioprine, n (%)                          | 15 | 0 (0%)           | 16 | 0 (0%)  | 16 | 0 (0%)  | 15               | 0 (0%)  |   |   |
| - Methotrexate, n (%)                          | 15 | 0 (0%)           | 16 | 1 (6%)  | 16 | 1 (6%)  | 15               | 0 (0%)  |   |   |
| <b>Right-heart catheterization</b>             |    |                  |    |         |    |         |                  |         |   |   |
| - mPAP (mmHg), mean ( $\pm$ SD)                | 15 | 44 ( $\pm$ 10)   | /  | /       | /  | 24      | 37 ( $\pm$ 8)    | /       | / | / |
| - PAWP (mmHg), mean ( $\pm$ SD)                | 15 | 10 ( $\pm$ 2)    | /  | /       | /  | 24      | 10 ( $\pm$ 3)    | /       | / | / |
| - CO (L/min), mean ( $\pm$ SD)                 | 15 | 4.9 ( $\pm$ 1.6) | /  | /       | /  | 24      | 4.6 ( $\pm$ 1.2) | /       | / | / |
| - CI (L/min/m <sup>2</sup> ), mean ( $\pm$ SD) | 15 | 2.7 ( $\pm$ 1.0) | /  | /       | /  | 18      | 2.5 ( $\pm$ 0.5) | /       | / | / |
| - PVR (WU), mean ( $\pm$ SD)                   | 15 | 8.5 ( $\pm$ 5.0) | /  | /       | /  | 24      | 6.2 ( $\pm$ 2.3) | /       | / | / |

¶

**Supplementary Table 1. Detailed characteristics of patients from the discovery and validation cohorts**

ACA: anti-centromere antibodies; ANA: antinuclear antibodies; ATA: anti-topoisomerase I antibodies; Anti-U1RNP: anti-U1-ribonucleoprotein antibodies; BMI: body-mass index; BNP: brain natriuretic peptide; CI: cardiac index; CO: cardiac output; DLCO: diffusing capacity of the lung for carbon monoxide; eGFR: estimated glomerular filtration rate; FVC: forced vital capacity; ILD: interstitial lung disease; LVEF: left ventricular ejection fraction; mPAP: mean pulmonary arterial pressure; Nt-pro-BNP: N-terminal pro-brain natriuretic peptide; NYHA: New York Heart Association; PAH: pulmonary arterial hypertension; PAWP: pulmonary arterial wedge pressure; PVR: pulmonary vascular resistance; Q: quartile; RP: Raynaud phenomenon; SD: standard deviation; sPAP: systolic pulmonary arterial pressure; SSc: systemic sclerosis; WU: Wood unit; y: year; yo: year old.
